# Supplementary material for: Distinct molecular abnormalities underlie unique clinical features of essential thrombocythemia in children
Source: PubMed Central journal article supplement — Leukemia. 2015 Jul 17;30(3):746–9. doi: 10.1038/leu.2015.167 (PMC4777775; doi:10.1038/leu.2015.167), 2015-07-17
Supplement: leu2015167x1.pdf [file leu2015167x1.pdf]

# **Distinct molecular abnormalities underlie unique clinical features of essential thrombocythemia in children**

## **Supplementary methods**

### **Patients and diagnostic criteria**

The study was approved by the hospital-based ethics committees according to the guidelines of the Helsinki Declaration. Informed consent was obtained from the patients' legal guardians. Major bleeding events were defined in agreement with the international recommendations.<sup>1</sup> Major thrombotic events were defined as ischemic stroke, cerebral transient ischemic attacks, acute myocardial infarction, or thrombosis in vital visceral organs or peripheral vessels.<sup>2</sup> The diagnosis of post-ET myelofibrosis was made according to the criteria suggested by the International Working Group for Myelofibrosis Research and Treatment.<sup>3</sup>

### **Investigation of JAK2, MPL, CALR mutations and the JAK2 46/1 haplotype**

Genomic DNA was extracted from bone marrow cells or granulocytes isolated from peripheral blood samples using the Wizard Genomic DNA Purification Kit (Promega, Madison, WI, USA) according to the manufacturer's instructions. Germline DNA was extracted from nails or hair follicles using the QIAamp DNA Investigator Kit (Qiagen, Hilden, Germany) according to the manufacturer's instructions. JAK2 V617F mutation was detected by a quantitative real-time polymerase chain reaction (PCR) assay, using 20ng genomic DNA as described previously.<sup>4</sup> Briefly, PCR amplification was performed on an ABI StepOne Detection System (Applied Biosystems, Foster City, CA, USA) according to the following cycling conditions: 10 minutes at 95 °C followed by 40 cycles of 15 seconds at 95 °C and 60 seconds at 60 °C. Primers for JAK2 V617F mutation (forward primer

5'-AAGCTTTCTCACAAGCATTGGTTT-3' and reverse primer 5'-AGAAAGGCATTAGAAAGCCTGTAGTT-3') were used together with TaqMan probes (Applied Biosystems, Foster City, CA, USA) specific for either wild type (VIC-5'-TCTCCACAGACACATAC-3'-MGB) or mutant JAK2 allele (FAM-5'-TCCACAGAAACATAC-3'-MGB). DNA from a healthy control homozygous for wild type JAK2 and from a polycythemia vera patient harboring 100% mutant allele were mixed in various proportions to generate a standard curve for  $JAK2_{V617F}/JAK2_{total}$  against  $\Delta Ct$  ( $Ct_{JAK2 V617F} - Ct_{JAK2 WT}$ ). All samples were measured in triplicate, and the mean  $\Delta Ct$  was used to calculate  $JAK2_{V617F}/JAK2_{total}$ . Genotypes of MPL exon 10, CALR exon 9, and the JAK2 46/1 haplotype (rs12340895) were assessed by Sanger sequencing. Primers used for amplifying CALR exon 9, MPL exon 10 and JAK2 46/1 haplotype were as follows: forward primer 5'-AAAGCAAGGGCTATCGGGTAT-3' and reverse primer 5'-GGGGACATCTTCCTCCTCATC-3' (CALR); forward primer 5'-CCGAAGTCTGACCCTTTTGTG-3' and reverse primer 5'-ACAGAGCGAACCAAGAATGC-3' (MPL)<sup>5</sup>; forward primer 5'-TTTAAGAACTGCCACAGCTACC-3' and reverse primer 5'-CCTGGATTCTTCATGGTCC-3' (JAK2 46/1 haplotype).

### **Selection of candidate genes and target enrichment kit design**

DNA samples from granulocytes were available for next-generation sequencing in 25 patients. The list of the 55 candidate genes is available in Supplementary Table 1. Candidate genes were selected based on the data in the Catalogue of Somatic Mutations in Cancer (COSMIC) (<http://cancer.sanger.ac.uk/cancergenome/projects/cosmic/>) and in the previous literature.<sup>5-13</sup> The coordinates of the sequence data were based on the National Center for Biotechnology Information (NCBI) build 37 (UCSC hg19).<sup>14</sup> We designed a customized Agilent SureSelect target capture kit

(<https://earray.chem.agilent.com/suredesign/index.htm>) to enrich for candidate genes. Sureselect baits were designed to capture the 2-kb upstream region of the transcription start site, all exons, and 20 bp of each exon-intron junction, with a total size of ~0.35 Mb.

### **Library preparation, target enrichment, sequencing and data analysis**

Sample preparation was performed according to the manufacturer's instructions (SureSelect XT Custom 1kb-499kb library, Cat. No. 5190–4806, SureSelect Library prep kit; Agilent Technologies, Inc.). DNA paired-end 200bp short-insert libraries were constructed and captured libraries were then loaded on the Illumina HiSeq2000 platform. The bioinformatics analysis began from the sequencing data (raw data) which generated from the Illumina pipeline. The reads with too many N bases (> 10%) or low base quality (> 50% bases with base quality < 5) were discarded. Alignment of the sequence data was performed using the Burrows-Wheeler Aligner,<sup>15</sup> to hg19.<sup>14</sup> SAMTools<sup>16</sup> was used to remove duplicated reads. SOAPsnp was used to detect single-nucleotide polymorphisms (SNP).<sup>17</sup> Small Insertion/Deletions were detected by SAMTools.<sup>16</sup> We used ANNOVAR<sup>18</sup> to annotate the confident variant results. SNP in the 1000 Genomes Project (<http://www.1000genomes.org>) was excluded. Mutations that were marked as polymorphisms or non-cancer specific variations in the SM2PH (<http://decryphon.igbmc.fr/sm2ph/cgi-bin/home>), SNPeffect (<http://snpeffect.switchlab.org/>) or CanProVar 2.0 database (<http://lifecenter.sgst.cn/CanProVar/index.html>) were also excluded.

### **Assessment of the possible effects of somatic mutations**

According to their effect, somatic mutations were classified into three groups: oncogenic mutations, possible oncogenic mutations, and mutations of unknown effect.<sup>19</sup> Mutations were considered to be oncogenic in case of a truncating variant or a missense variant described as pathogenic in previous

literature. Novel variants that were not present in the dbSNP137 database (<http://www.ncbi.nlm.nih.gov/SNP>) were called possible oncogenic mutations if they cluster ( $\pm 3$ aa) with known oncogenic variants in the COSMIC database.<sup>19</sup> Conserved residues in different mammals usually play an important role for maintaining the normal structure and function of the protein. So variants in conserved residues were also considered as possible oncogenic mutations. Protein sequences, gene functions, and pathway analysis were based on the NCBI resources (<http://www.ncbi.nlm.nih.gov/protein/>) and the Gene Ontology website (<http://www.geneontology.org/>). The three-dimensional structure was analyzed using the Cn3D software (<http://www.ncbi.nlm.nih.gov/Structure/CN3D/cn3d.shtml>).

#### **PCR amplification conditions**

PCR amplification conditions were 95 °C for 5 min; 94 °C for 30 s, 56 °C to 65 °C for 30 s, 72 °C for 30 s for 35 cycles; and 72 °C for 10 min. All PCR products were confirmed by 2% agarose gel electrophoresis, purified using QIAquick Spin Kit (Qiagen, SantaClara, CA, USA) and sequenced using ABI PRISM 3730  $\times 1$  DNA Analyzer (Applied Biosystems, Foster City, CA, USA).

#### **Statistical analysis**

Data were analyzed using the software SPSS 16.0. Categorical variables were compared by  $\chi^2$  test or Fisher exact test. The Mann–Whitney *U*-test or *t*-test was used for quantitative values. A two-tailed  $P \leq 0.05$  was considered statistically significant.

## References

1. Schulman S, Kearon C. Definition of major bleeding in clinical investigations of antihemostatic medicinal products in non-surgical patients. *J Thromb Haemost* 2005; **3**: 692-694.
2. Barbui T, Finazzi G, Carobbio A, Thiele J, Passamonti F, Rumi E *et al.* Development and validation of an International Prognostic Score of thrombosis in World Health Organization-essential thrombocythemia (IPSET-thrombosis). *Blood* 2012; **120**: 5128-5133.
3. Barosi G, Mesa RA, Thiele J, Cervantes F, Campbell PJ, Verstovsek S *et al.* Proposed criteria for the diagnosis of post-polycythemia vera and post-essential thrombocythemia myelofibrosis: a consensus statement from the International Working Group for Myelofibrosis Research and Treatment. *Leukemia* 2008; **22**: 437-438.
4. Carobbio A, Antonioli E, Guglielmelli P, Vannucchi AM, Delaini F, Guerini V *et al.* Leukocytosis and risk stratification assessment in essential thrombocythemia. *J Clin Oncol* 2008; **26**: 2732-2736.
5. Brecqueville M, Rey J, Bertucci F, Coppin E, Finetti P, Carbuccia N *et al.* Mutation analysis of ASXL1, CBL, DNMT3A, IDH1, IDH2, JAK2, MPL, NF1, SF3B1, SUZ12, and TET2 in myeloproliferative neoplasms. *Genes Chromosomes Cancer* 2012; **51**: 743-755.
6. Reuther GW. Recurring mutations in myeloproliferative neoplasms alter epigenetic regulation of gene expression. *Am J Cancer Res* 2011; **1**: 752-762.
7. Hou Y, Song L, Zhu P, Zhang B, Tao Y, Xu X *et al.* Single-cell exome sequencing and

- monoclonal evolution of a JAK2-negative myeloproliferative neoplasm. *Cell* 2012; **148**: 873-885.
8. Greenberg PL. Molecular and genetic features of myelodysplastic syndromes. *Int J Lab Hematol* 2012; **34**: 215-222.
  9. Tefferi A. Novel mutations and their functional and clinical relevance in myeloproliferative neoplasms: JAK2, MPL, TET2, ASXL1, CBL, IDH and IKZF1. *Leukemia* 2010; **24**: 1128-1138.
  10. Larsson CA, Cote G, Quintas-Cardama A. The changing mutational landscape of acute myeloid leukemia and myelodysplastic syndrome. *Mol Cancer Res* 2013; **11**: 815-827.
  11. Thol F, Kade S, Schlarman C, Loffeld P, Morgan M, Krauter J *et al.* Frequency and prognostic impact of mutations in SRSF2, U2AF1, and ZRSR2 in patients with myelodysplastic syndromes. *Blood* 2012; **119**: 3578-3584.
  12. Harada H, Harada Y, Niimi H, Kyo T, Kimura A, Inaba T. High incidence of somatic mutations in the AML1/RUNX1 gene in myelodysplastic syndrome and low blast percentage myeloid leukemia with myelodysplasia. *Blood* 2004; **103**: 2316-2324.
  13. Bejar R, Stevenson K, Abdel-Wahab O, Galili N, Nilsson B, Garcia-Manero G *et al.* Clinical effect of point mutations in myelodysplastic syndromes. *N Engl J Med* 2011; **364**: 2496-2506.
  14. Lander ES, Linton LM, Birren B, Nusbaum C, Zody MC, Baldwin J *et al.* Initial sequencing and analysis of the human genome. *Nature* 2001; **409**: 860-921.
  15. Li H, Durbin R. Fast and accurate short read alignment with Burrows-Wheeler transform.

- Bioinformatics* 2009; **25**: 1754-1760.
16. Li H, Handsaker B, Wysoker A, Fennell T, Ruan J, Homer N *et al.* The Sequence Alignment/Map format and SAMtools. *Bioinformatics* 2009; **25**: 2078-2079.
  17. Li R, Li Y, Fang X, Yang H, Wang J, Kristiansen K. SNP detection for massively parallel whole-genome resequencing. *Genome Res* 2009; **19**: 1124-1132.
  18. Wang K, Li M, Hakonarson H. ANNOVAR: functional annotation of genetic variants from high-throughput sequencing data. *Nucleic Acids Res* 2010; **38**: e164.
  19. Papaemmanuil E, Gerstung M, Malcovati L, Tauro S, Gundem G, Van Loo P *et al.* Clinical and biological implications of driver mutations in myelodysplastic syndromes. *Blood* 2013; **122**: 3616-3627.
  20. Zhong Y, Wu J, Ma R, Cao H, Wang Z, Ding J *et al.* Association of Janus kinase 2 (JAK2) polymorphisms with acute leukemia susceptibility. *Int J Lab Hematol* 2012; **34**: 248-253.
  21. Gelsi-Boyer V, Brecqueville M, Devillier R, Murati A, Mozziconacci MJ, Birnbaum D. Mutations in ASXL1 are associated with poor prognosis across the spectrum of malignant myeloid diseases. *J Hematol Oncol* 2012; **5**: 12.
  22. Wu SJ, Tang JL, Lin CT, Kuo YY, Li LY, Tseng MH *et al.* Clinical implications of U2AF1 mutation in patients with myelodysplastic syndrome and its stability during disease progression. *Am J Hematol* 2013; **88**: E277-282.
  23. Przychodzen B, Jerez A, Guinta K, Sekeres MA, Padgett R, Maciejewski JP *et al.* Patterns of missplicing due to somatic U2AF1 mutations in myeloid neoplasms. *Blood* 2013; **122**:

999-1006.

24. Klco JM, Spencer DH, Miller CA, Griffith M, Lamprecht TL, O'Laughlin M *et al.* Functional heterogeneity of genetically defined subclones in acute myeloid leukemia. *Cancer Cell* 2014; **25**: 379-392.
25. De Filippi P, Zecca M, Lisini D, Rosti V, Cagioni C, Carlo-Stella C *et al.* Germ-line mutation of the NRAS gene may be responsible for the development of juvenile myelomonocytic leukaemia. *Br J Haematol* 2009; **147**: 706-709.
26. Murphy SJ, Hart SN, Lima JF, Kipp BR, Klebig M, Winters JL *et al.* Genetic alterations associated with progression from pancreatic intraepithelial neoplasia to invasive pancreatic tumor. *Gastroenterology* 2013; **145**: 1098-1109.



**Supplementary Table 1. List of the 55 candidate genes in high-throughput targeted capture sequencing**

| No. | Genes  | NCBI: ID | Position | No. | Genes  | NCBI: ID | Position      |
|-----|--------|----------|----------|-----|--------|----------|---------------|
| 1   | ASXL1  | 171023   | 20q11.1  | 29  | PDGFRA | 5156     | 4q12          |
| 2   | ATRX   | 546      | Xq21.1   | 30  | PHF6   | 84295    | Xq26.2        |
| 3   | BCOR   | 54880    | Xp11.14  | 31  | PTEN   | 5728     | 10q23.3       |
| 4   | CBL    | 867      | 11q23.3  | 32  | PTPN11 | 5781     | 12q24.1       |
| 5   | CDKN2A | 1029     | 9p21     | 33  | RUNX1  | 861      | 21q22.3       |
| 6   | CEBPA  | 1050     | 19q13.1  | 34  | SF3B1  | 23451    | 2q33.1        |
| 7   | CSF1R  | 1436     | 5q2      | 35  | SH2B3  | 10019    | 12q24.12      |
| 8   | DNMT3A | 1788     | 2p23     | 36  | SOCS1  | 8651     | 16p13.13      |
| 9   | ETV6   | 2120     | 12p13.2  | 37  | SRSF2  | 6427     | 17q25.1       |
| 10  | EZH2   | 2146     | 7q35-q36 | 38  | TET2   | 54790    | 4q24          |
| 11  | FLT3   | 2322     | 13q12    | 39  | TP53   | 7157     | 17p13.1       |
| 12  | GATA1  | 2623     | Xp11.23  | 40  | U2AF1  | 7307     | 21q22.3       |
| 13  | GATA2  | 2624     | 3q21.3   | 41  | WT1    | 7490     | 1p13          |
| 14  | GNAS   | 2778     | 20q13.3  | 42  | ZRSR2  | 8233     | Xp22.1        |
| 15  | HRAS   | 3265     | 11p15.5  | 43  | THPO   | 7066     | 3q27          |
| 16  | IDH1   | 3417     | 2q33.3   | 44  | EED    | 8726     | 11q14.2-q22.3 |
| 17  | IDH2   | 3418     | 15q26.1  | 45  | JARID2 | 3720     | 6p24-p23      |
| 18  | IKZF1  | 10320    | 7p13     | 46  | RBBP4  | 5928     | 1p35.1        |
| 19  | JAK2   | 3717     | 9p24     | 47  | SUZ12  | 23512    | 17q11.2       |
| 20  | JAK3   | 3718     | 19p13.1  | 48  | STAT5B | 6777     | 17q11.2       |
| 21  | KIT    | 3815     | 4q12     | 49  | STAT3  | 6774     | 17q21.31      |
| 22  | KRAS   | 3845     | 12p12.1  | 50  | SOCS2  | 8835     | 12q           |
| 23  | MECOM  | 2122     | 3q26     | 51  | SOCS3  | 9021     | 17q25.3       |
| 24  | KMT2A  | 4297     | 11q23    | 52  | CBFB   | 865      | 16q22.1       |
| 25  | MPL    | 4352     | 1p34.2   | 53  | PPP2R4 | 5524     | 9q34          |
| 26  | NF1    | 4763     | 17q11.2  | 54  | IER3   | 8870     | 6p21.3        |
| 27  | NPM1   | 4869     | 5q35     | 55  | SPARC  | 6678     | 5q31.3-q32    |
| 28  | NRAS   | 4893     | 1p13.2   |     |        |          |               |

Abbreviations: NCBI, National Center of Biotechnology Information

**Supplementary Table 2. Primers for validating mutations by Sanger sequencing**

| Mutations        | Forward (5'-3')            | Reverse (5'-3')         | Length (bp) | T (°C) |
|------------------|----------------------------|-------------------------|-------------|--------|
| JAK2 I354T       | ATTGGTATGTAGGGCTGATGC      | TGGGCCATGACAGTTGCT      | 799         | 60     |
| JAK2 G127D       | CCTTTCAGTATGCTGTAGGTGACT   | ACCTGAGCAAAGAGGTAAGACA  | 211         | 60     |
| ASXL1 M1096L     | CACGGATACAGCCTCTGACTT      | ACTTGGGACTGCCTTGCA      | 634         | 57     |
| ASXL1 R693X      | GGTCAGCCCACTTACCAGAT       | TCCTTGCTCCTCATCATCACT   | 654         | 57     |
| ASXL1 R1068X     | CACGGATACAGCCTCTGACTT      | ACTTGGGACTGCCTTGCA      | 634         | 57     |
| ASXL1 R1273H     | GCAGTTCTCTTCCTTTAGTT       | CCTGTAACATTGCTCTGAT     | 198         | 58     |
| SH2B3 P126Q      | CGCGACTACCGGGACACA         | AGGCTCCAGGGCAGGAACT     | 302         | 56     |
| U2AF1 S34F       | ACAGCAAGGAAGAGGAGGTG       | AAACAAGGAGTGGTGGTCTCA   | 448         | 65     |
| FLT3 R372G       | CTCAATACGTTTCCCTATGAA      | TGTATCCGTTATCAAGACCC    | 229         | 60     |
| NRAS G13D        | CAGACAGTCTCGCTACTATGGC     | AGGGAGAATGGGAAGGAGTT    | 766         | 57     |
| MLL G73E         | GGCGCAGAGCTGGTTAGG         | GCAGGTTGGTGCCGATG       | 488         | 65     |
| GNAS R186H       | TCCGTTGAGCCTGACCTTG        | AGAGCGTGAGCAGCGACC      | 591         | 57     |
| RUNX1 P76L       | AACTTCCTCTGCTCCGTGCTG      | TGCTGCTAGTGTAGTAGGGTGA  | 997         | 60     |
| CALR L367fs*46   | AAAGCAAGGGCTATCGGGTAT      | GGGGACATCTTCTCTCATC     | 407         | 57     |
| WT1 P136delinsPP | TGTGCCCTGCCTGTGAGC         | TGGACAGTGAAGGCGCTCAG    | 215         | 58     |
| ZRSR2            | AGAAATGGGAATCCGAGAG        | CCATCTGCGTTCATAGCCTTC   | 361         | 57     |
| G438delinsGSR    | GGATGTGTTGAGGCTGTATTTA     | AGCTGTGTGGCATAAGTGC     | 227         | 60     |
| STAT5B           | GGATGTGTTGAGGCTGTATTTA     | AGCTGTGTGGCATAAGTGC     | 227         | 60     |
| K71delinsKK      | GGATGTGTTGAGGCTGTATTTA     | AGCTGTGTGGCATAAGTGC     | 227         | 60     |
| SH2B3 R140H      | CGCGACTACCGGGACACA         | AGGCTCCAGGGCAGGAACT     | 302         | 56     |
| U2AF1 G217S      | TTCCACAAGAAATAAGTTACACCA   | GAAGAAGACAGAAGATGCAAGG  | 567         | 57     |
| FLT3 G282E       | CGGGAAAAGGAAGAGGGT         | TGCTGTGCCAGAAATGAACT    | 937         | 57     |
| IDH1 I189V       | AGAATCATAGGGATAGGGAGATAACA | ATTTGGTTGTGGTGGGTGA     | 359         | 60     |
| JAK3 R175Q       | ATTGGTTTGGGCTGGAGAAG       | GGGTCATAGGAACACCCTGA    | 575         | 58     |
| GATA1 H71P       | GGGGTGAAGGATTTCTGTG        | GCAAAAATCAGTCTAGGGTCAGC | 764         | 57     |
| CSF1R R748W      | CCCCATTTGCTTGATAACA        | GCCAGGTTCTACTCACATT     | 212         | 58     |

Abbreviations: T, annealing temperature

**Supplementary Table 3. Clinical and laboratory characteristics of 63 children diagnosed with essential thrombocythemia**

|                                            | Total<br>(n = 63) | JAK2 V617F +<br>(n = 14) | JAK2 V617F –<br>CALR-<br>(n = 49) | <i>P</i> |
|--------------------------------------------|-------------------|--------------------------|-----------------------------------|----------|
| Clinical characteristics at diagnosis      |                   |                          |                                   |          |
| M/F                                        | 38/25             | 8/6                      | 30/19                             | 0.783    |
| Age, median (range), y                     | 11 (3–14)         | 10 (5–14)                | 12 (3–14)                         | 0.153    |
| Symptoms, n (%)                            | 39 (61.9)         | 8 (57.1)                 | 31 (63.3)                         | 0.677    |
| Organomegaly, n (%)                        | 33 (52.4)         | 7 (50.0)                 | 26 (53.1)                         | 0.840    |
| Hematologic features                       |                   |                          |                                   |          |
| WBCs, median (range), × 10 <sup>9</sup> /L | 10.6 (4.3–24.1)   | 11.8 (8.1–18.7)          | 10.0 (4.3–24.1)                   | 0.126    |
| HGB, median (range), g/L                   | 127 (110–167)     | 135 (110–167)            | 126 (110–163)                     | 0.118    |
| PLTs, median (range), × 10 <sup>9</sup> /L | 1224 (513–4378)   | 1109 (714–3958)          | 1320 (513–4378)                   | 0.381    |
| Complications and Clinical outcomes        |                   |                          |                                   |          |
| Major thrombosis, n (%)                    | 3 (4.8)           | 2 (14.3)                 | 1 (2.0)                           | 0.121    |
| Microvascular disturbances, n (%)          | 30 (47.6)         | 5 (35.7)                 | 25 (51.0)                         | 0.312    |
| Major bleeding events, n (%)               | 0                 | 0                        | 0                                 |          |
| Minor bleeding events, n (%)               | 9 (14.3%)         | 4 (28.6%)                | 5 (10.2)                          | 0.194    |
| Transformation to myelofibrosis            | 2 (3.2)           | 1 (7.1)                  | 1 (2.0)                           | 0.398    |
| Secondary malignancies, n (%)              | 0                 | 0                        | 0                                 |          |
| Follow-up, n (%)                           |                   |                          |                                   |          |
| Median (range), months                     | 48 (12–302)       | 60 (12–302)              | 47 (12–156)                       | 0.153    |

Abbreviations: F, female; HGB, hemoglobin; M, male; PLT, platelet; WBC, white blood cell.

**Supplementary Table 4. Clinical and hematologic features of 25 children with essential thrombocythemia involved in targeted high-throughput sequencing**

|                                              | Total pediatric<br>ET<br>(n = 25) | Mutated<br>(n = 14) | Non-mutated<br>(n = 11) | <i>P</i>     |
|----------------------------------------------|-----------------------------------|---------------------|-------------------------|--------------|
| <b>Clinical characteristics at diagnosis</b> |                                   |                     |                         |              |
| M/F                                          | 13/12                             | 7/7                 | 6/5                     | 1.000        |
| Age, median (range), y                       | 10 (3-14)                         | 11.5 (3-14)         | 9 (4-13)                | 0.144        |
| Symptoms, n (%)                              | 16 (64.0)                         | 8 (57.1)            | 8 (72.7)                | 0.677        |
| Organomegaly, n (%)                          | 9 (36.0)                          | 5 (35.7)            | 4 (36.4)                | 1.000        |
| <b>Hematologic features</b>                  |                                   |                     |                         |              |
| WBCs, median (range), $\times 10^9/L$        | 11.2 (6.8-23.4)                   | 13.0 (7.2-23.4)     | 9.6 (6.8-15.3)          | <b>0.025</b> |
| HB, median (range), g/L                      | 125 (110-167)                     | 128 (110-167)       | 124 (113-149)           | 0.584        |
| PLTs, median (range), $\times 10^9/L$        | 1399<br>(513-4378)                | 1362<br>(714-3958)  | 1399<br>(513-4378)      | 0.622        |
| <b>Complications</b>                         |                                   |                     |                         |              |
| Major thrombosis                             | 1 (4.0)                           | 1 (7.1)             | 0                       |              |
| Major bleeding events                        | 0                                 | 0                   | 0                       |              |
| <b>Treatment</b>                             |                                   |                     |                         |              |
| No treatment                                 | 5 (20.0)                          | 3 (21.4)            | 2 (18.2)                | 1.000        |
| Antiplatelet therapy                         | 14 (56.0)                         | 9 (64.3)            | 5 (45.5)                | 0.435        |
| Cytoreductive drugs                          | 15 (60.0)                         | 7 (50.0)            | 8 (72.7)                | 0.414        |
| <b>Follow-up, n (%)</b>                      |                                   |                     |                         |              |
| Median, months (range)                       | 46 (12-180)                       | 52 (18-180)         | 43 (12-166)             |              |

**Supplementary Table 5. Total single nucleotide variants identified by targeted high-throughput sequencing**

| Gene   | CHR   | POS      | rsID        | lkg<br>Frequency | *Cosmic | Exonic Function | TransID      | c.       | p.       | No. of<br>Samples |
|--------|-------|----------|-------------|------------------|---------|-----------------|--------------|----------|----------|-------------------|
| HRAS   | chr11 | 534242   | rs12628     | 0.19             | 1       | synonymous      | NM_001130442 | c.T81C   | p.H27H   | 10                |
| JAK2   | chr9  | 5022042  | rs150159583 | .                | 0       | nonsynonymous   | NM_004972    | c.A55T   | p.I19L   | 1                 |
| JAK2   | chr9  | 5044432  | rs56118985  | 0.01             | 0       | nonsynonymous   | NM_004972    | c.G380A  | p.G127D  | 1                 |
| JAK2   | chr9  | 5050706  | rs2230722   | 0.26             | 0       | synonymous      | NM_004972    | c.C489T  | p.H163H  | 12                |
| JAK2   | chr9  | 5064887  | .           | .                | 0       | nonsynonymous   | NM_004972    | c.T1061C | p.I354T  | 1                 |
| JAK2   | chr9  | 5073770  | rs77375493  | .                | 1       | nonsynonymous   | NM_004972    | c.G1849T | p.V617F  | 6                 |
| JAK2   | chr9  | 5081780  | rs2230724   | 0.41             | 0       | synonymous      | NM_004972    | c.G2490A | p.L830L  | 15                |
| JAK2   | chr9  | 5126407  | rs140219534 | 0.01             | 0       | synonymous      | NM_004972    | c.T3252C | p.N1084N | 2                 |
| TP53   | chr17 | 7578456  | rs139200646 | .                | 1       | synonymous      | NM_001126115 | c.C78T   | p.R26R   | 1                 |
| TP53   | chr17 | 7578546  | .           | .                | 1       | synonymous      | NM_000546    | c.T384G  | p.P128P  | 1                 |
| TP53   | chr17 | 7579472  | rs1042522   | 0.61             | 0       | nonsynonymous   | NM_000546    | c.C215G  | p.P72R   | 19                |
| ETV6   | chr12 | 11992168 | rs11611479  | 0.19             | 0       | synonymous      | NM_001987    | c.G258A  | p.T86T   | 12                |
| JARID2 | chr6  | 15496662 | rs742099    | 0.28             | 0       | synonymous      | NM_004973    | c.C1206T | p.P402P  | 9                 |
| JARID2 | chr6  | 15513482 | rs2235258   | 0.66             | 1       | synonymous      | NM_004973    | c.G3279A | p.L1093L | 19                |
| JARID2 | chr6  | 15513542 | rs200784767 | 0.0017           | 0       | synonymous      | NM_004973    | c.C3339T | p.H1113H | 1                 |
| ZRSR2  | chrX  | 15821890 | rs188867560 | 0.0047           | 0       | nonsynonymous   | NM_005089    | c.G283A  | p.A95T   | 2                 |
| ZRSR2  | chrX  | 15838366 | rs2301724   | 0.61             | 0       | synonymous      | NM_005089    | c.C864T  | p.N288N  | 19                |
| JAK3   | chr19 | 17953878 | .           | .                | 0       | nonsynonymous   | NM_000215    | c.G524A  | p.R175Q  | 1                 |
| KRAS   | chr12 | 25368462 | rs4362222   | 1                | 0       | synonymous      | NM_033360    | c.G483A  | p.R161R  | 24                |
| DNMT3A | chr2  | 25536827 | rs41284843  | 0.08             | 0       | synonymous      | NM_022552    | c.C27T   | p.P9P    | 6                 |
| FLT3   | chr13 | 28599041 | .           | .                | 0       | synonymous      | NM_004119    | c.G2247A | p.S749S  | 1                 |
| FLT3   | chr13 | 28608459 | rs34374211  | 0.16             | 1       | synonymous      | NM_004119    | c.A1683G | p.L561L  | 6                 |
| FLT3   | chr13 | 28622503 | .           | .                | 0       | nonsynonymous   | NM_004119    | c.A1114G | p.R372G  | 1                 |
| FLT3   | chr13 | 28622544 | rs34172843  | 0.03             | 0       | nonsynonymous   | NM_004119    | c.A1073T | p.D358V  | 2                 |
| FLT3   | chr13 | 28623809 | .           | .                | 0       | nonsynonymous   | NM_004119    | c.G845A  | p.G282E  | 1                 |
| FLT3   | chr13 | 28624294 | rs1933437   | 0.75             | 0       | nonsynonymous   | NM_004119    | c.C680T  | p.T227M  | 24                |
| FLT3   | chr13 | 28636084 | rs7338903   | 1                | 0       | synonymous      | NM_004119    | c.C288T  | p.D96D   | 25                |
| FLT3   | chr13 | 28674628 | rs12872889  | 0.31             | 0       | nonsynonymous   | NM_004119    | c.A20G   | p.D7G    | 10                |
| NF1    | chr17 | 29490284 | rs146691765 | 0.01             | 0       | synonymous      | NM_000267    | c.C369G  | p.T123T  | 1                 |
| NF1    | chr17 | 29508775 | rs1801052   | 0.59             | 0       | synonymous      | NM_000267    | c.G702A  | p.L234L  | 22                |
| NF1    | chr17 | 29552200 | rs146051850 | 0.01             | 0       | nonsynonymous   | NM_000267    | c.A1933G | p.M645V  | 1                 |
| NF1    | chr17 | 29553485 | rs2285892   | 0.51             | 0       | synonymous      | NM_000267    | c.G2034A | p.P678P  | 21                |
| NF1    | chr17 | 29677247 | rs201287021 | 0.0035           | 0       | synonymous      | NM_000267    | c.A7305G | p.K2435K | 2                 |
| NF1    | chr17 | 29686006 | rs78610439  | .                | 0       | nonsynonymous   | NM_000267    | c.G8070T | p.L2690F | 2                 |
| SUZ12  | chr17 | 30264415 | .           | .                | 0       | synonymous      | NM_015355    | c.C150T  | p.G50G   | 1                 |
| ASXL1  | chr20 | 31019164 | .           | .                | 0       | synonymous      | NM_015338    | c.G759A  | p.E253E  | 1                 |
| ASXL1  | chr20 | 31022469 | rs3746609   | 0.08             | 0       | nonsynonymous   | NM_015338    | c.G1954A | p.G652S  | 5                 |

|         |       |          |             |        |   |               |              |          |          |    |
|---------|-------|----------|-------------|--------|---|---------------|--------------|----------|----------|----|
| ASXL1   | chr20 | 31022592 | .           | .      | 1 | stopgain      | NM_015338    | c.C2077T | p.R693X  | 1  |
| ASXL1   | chr20 | 31022959 | rs6058694   | 1      | 0 | nonsynonymous | NM_015338    | c.T2444C | p.L815P  | 25 |
| ASXL1   | chr20 | 31023717 | .           | .      | 1 | stopgain      | NM_015338    | c.C3202T | p.R1068X | 1  |
| ASXL1   | chr20 | 31023801 | .           | .      | 0 | nonsynonymous | NM_015338    | c.A3286C | p.M1096L | 1  |
| ASXL1   | chr20 | 31024001 | .           | .      | 0 | synonymous    | NM_015338    | c.T3486G | p.V1162V | 1  |
| ASXL1   | chr20 | 31024274 | rs4911231   | 0.74   | 0 | synonymous    | NM_015338    | c.T3759C | p.S1253S | 25 |
| ASXL1   | chr20 | 31024333 | .           | .      | 1 | nonsynonymous | NM_015338    | c.G3818A | p.R1273H | 1  |
| WT1     | chr11 | 32417945 | rs16754     | 0.71   | 1 | synonymous    | NM_000378    | c.A1056G | p.R352R  | 20 |
| WT1     | chr11 | 32456562 | rs1799925   | 0.7    | 0 | synonymous    | NM_000378    | c.C330T  | p.P110P  | 22 |
| WT1     | chr11 | 32456694 | rs2234582   | 0.06   | 0 | synonymous    | NM_000378    | c.G198T  | p.P66P   | 1  |
| RBBP4   | chr1  | 33133968 | rs2762904   | 1      | 0 | synonymous    | NM_001135255 | c.T450C  | p.V150V  | 25 |
| RUNX1   | chr21 | 36259183 | .           | .      | 0 | nonsynonymous | NM_001001890 | c.C227T  | p.P76L   | 1  |
| BCOR    | chrX  | 39911528 | rs200163930 | .      | 0 | nonsynonymous | NM_001123384 | c.T4946G | p.V1649G | 8  |
| BCOR    | chrX  | 39913225 | .           | .      | 0 | synonymous    | NM_001123384 | c.C4734T | p.D1578D | 1  |
| BCOR    | chrX  | 39931908 | rs3810693   | 0.03   | 0 | synonymous    | NM_001123383 | c.G2691C | p.S897S  | 1  |
| BCOR    | chrX  | 39932907 | rs6520618   | 0.69   | 0 | synonymous    | NM_001123383 | c.A1692G | p.A564A  | 20 |
| BCOR    | chrX  | 39933339 | rs5917933   | 0.97   | 0 | synonymous    | NM_001123383 | c.T1260C | p.D420D  | 25 |
| BCOR    | chrX  | 39933378 | .           | .      | 0 | synonymous    | NM_001123383 | c.C1221T | p.P407P  | 1  |
| STAT5B  | chr17 | 40362471 | rs75130700  | 0.01   | 0 | synonymous    | NM_012448    | c.C1725T | p.D575D  | 1  |
| STAT5B  | chr17 | 40371364 | .           | .      | 0 | nonsynonymous | NM_012448    | c.C799G  | p.P267A  | 1  |
| STAT5A  | chr17 | 40459446 | .           | .      | 0 | synonymous    | NM_003152    | c.C1707T | p.T569T  | 1  |
| STAT5A  | chr17 | 40459464 | .           | .      | 0 | synonymous    | NM_003152    | c.C1725T | p.D575D  | 1  |
| STAT5A  | chr17 | 40459737 | rs1135669   | 0.35   | 0 | synonymous    | NM_003152    | c.C1902T | p.D634D  | 7  |
| STAT3   | chr17 | 40475056 | rs117691970 | 0.03   | 0 | synonymous    | NM_003150    | c.C1854T | p.G618G  | 2  |
| STAT3   | chr17 | 40489599 | .           | .      | 0 | synonymous    | NM_003150    | c.C651T  | p.I217I  | 1  |
| MPL;MPL | chr1  | 43805240 | rs16830693  | 0.02   | 0 | synonymous    | NM_005373    | c.A690G  | p.E230E  | 3  |
| U2AF1   | chr21 | 44513286 | .           | .      | 0 | nonsynonymous | NM_001025203 | c.G649A  | p.G217S  | 1  |
| U2AF1   | chr21 | 44524456 | .           | .      | 1 | nonsynonymous | NM_001025203 | c.C101T  | p.S34F   | 1  |
| GATA1   | chrX  | 48649690 | rs139614533 | 0.01   | 1 | synonymous    | NM_002049    | c.G174A  | p.A58A   | 1  |
| GATA1   | chrX  | 48649728 | .           | .      | 0 | nonsynonymous | NM_002049    | c.A212C  | p.H71P   | 1  |
| IKZF1   | chr7  | 50367292 | rs61732861  | .      | 0 | synonymous    | NM_001220765 | c.C99T   | p.I33I   | 1  |
| IKZF1   | chr7  | 50467767 | rs61731355  | 0.05   | 1 | synonymous    | NM_001220772 | c.C192A  | p.P64P   | 3  |
| IKZF1   | chr7  | 50467941 | rs61731356  | 0.15   | 0 | synonymous    | NM_001220772 | c.C366T  | p.N122N  | 3  |
| PDGFRA  | chr4  | 55130078 | rs2229307   | 0.21   | 0 | synonymous    | NM_006206    | c.T612C  | p.N204N  | 6  |
| PDGFRA  | chr4  | 55133726 | rs4358459   | 0.21   | 0 | synonymous    | NM_006206    | c.T939G  | p.G313G  | 6  |
| PDGFRA  | chr4  | 55139771 | rs35597368  | 0.17   | 0 | nonsynonymous | NM_006206    | c.T1432C | p.S478P  | 5  |
| PDGFRA  | chr4  | 55141055 | rs1873778   | 1      | 1 | synonymous    | NM_006206    | c.A1701G | p.P567P  | 25 |
| PDGFRA  | chr4  | 55143577 | rs10028020  | 0.18   | 0 | synonymous    | NM_006206    | c.G1809A | p.A603A  | 5  |
| PDGFRA  | chr4  | 55152040 | rs2228230   | 0.17   | 1 | synonymous    | NM_006206    | c.C2472T | p.V824V  | 6  |
| PDGFRA  | chr4  | 55161391 | rs7685117   | 1      | 0 | synonymous    | NM_006206    | c.T3222C | p.D1074D | 25 |
| KIT     | chr4  | 55561861 | rs201872586 | 0.0017 | 0 | nonsynonymous | NM_000222    | c.C251T  | p.T84M   | 1  |

|       |       |           |             |        |   |               |              |           |          |    |
|-------|-------|-----------|-------------|--------|---|---------------|--------------|-----------|----------|----|
| KIT   | chr4  | 55593464  | rs3822214   | 0.05   | 1 | nonsynonymous | NM_000222    | c.A1621C  | p.M541L  | 1  |
| KIT   | chr4  | 55593481  | rs55986963  | 0.04   | 1 | synonymous    | NM_000222    | c.A1638G  | p.K546K  | 1  |
| KIT   | chr4  | 55602765  | rs3733542   | 0.05   | 1 | synonymous    | NM_000222    | c.G2586C  | p.L862L  | 1  |
| GNAS  | chr20 | 57478807  | rs7121      | 0.64   | 0 | synonymous    | NM_001077489 | c.C348T   | p.I116I  | 21 |
| GNAS  | chr20 | 57484421  | rs121913495 | .      | 1 | nonsynonymous | NM_001077489 | c.G557A   | p.R186H  | 1  |
| CBFB  | chr16 | 67116169  | rs78053453  | 0.02   | 0 | synonymous    | NM_001755    | c.C453T   | p.R151R  | 2  |
| SOCS3 | chr17 | 76354832  | .           | .      | 0 | synonymous    | NM_003955    | c.C345T   | p.P115P  | 1  |
| ATRX  | chrX  | 76937963  | rs3088074   | 0.49   | 0 | nonsynonymous | NM_138270    | c.C2671G  | p.Q891E  | 12 |
| ATRX  | chrX  | 76938208  | rs45624939  | 0.03   | 0 | nonsynonymous | NM_138270    | c.T2426C  | p.F809S  | 3  |
| EED   | chr11 | 85968623  | rs974144    | 0.33   | 1 | synonymous    | NM_003797    | c.C619T   | p.L207L  | 16 |
| IDH2  | chr15 | 90628537  | rs11540478  | 0.17   | 0 | synonymous    | NM_002168    | c.C1050T  | p.T350T  | 10 |
| IDH2  | chr15 | 90628549  | rs190078206 | 0.01   | 0 | synonymous    | NM_002168    | c.C1038T  | p.A346A  | 1  |
| IDH2  | chr15 | 90630372  | rs16943901  | 0.06   | 0 | synonymous    | NM_002168    | c.A939G   | p.G313G  | 2  |
| SOCS2 | chr12 | 93968598  | .           | .      | 0 | synonymous    | NM_003877    | c.C240T   | p.Y80Y   | 1  |
| TET2  | chr4  | 106155185 | rs12498609  | 0.23   | 0 | nonsynonymous | NM_001127208 | c.C86G    | p.P29R   | 9  |
| TET2  | chr4  | 106155751 | rs6843141   | 0.07   | 0 | nonsynonymous | NM_001127208 | c.G652A   | p.V218M  | 1  |
| TET2  | chr4  | 106158216 | rs3796927   | 0.07   | 0 | synonymous    | NM_001127208 | c.G3117A  | p.S1039S | 1  |
| TET2  | chr4  | 106190862 | rs3733609   | 0.07   | 0 | synonymous    | NM_001127208 | c.T4140C  | p.H1380H | 1  |
| TET2  | chr4  | 106196829 | rs34402524  | 0.04   | 0 | nonsynonymous | NM_001127208 | c.T5162G  | p.L1721W | 3  |
| TET2  | chr4  | 106196951 | rs2454206   | 0.19   | 0 | nonsynonymous | NM_001127208 | c.A5284G  | p.I1762V | 6  |
| SH2B3 | chr12 | 111856326 | .           | .      | 0 | nonsynonymous | NM_005475    | c.C377A   | p.P126Q  | 1  |
| SH2B3 | chr12 | 111856368 | .           | .      | 0 | nonsynonymous | NM_005475    | c.G419A   | p.R140H  | 1  |
| SH2B3 | chr12 | 111856673 | rs78894077  | 0.08   | 0 | nonsynonymous | NM_005475    | c.C724T   | p.P242S  | 7  |
| SH2B3 | chr12 | 111884608 | rs3184504   | 0.99   | 0 | nonsynonymous | NM_005475    | c.T784C   | p.W262R  | 25 |
| SH2B3 | chr12 | 111885984 | rs140649197 | 0.01   | 0 | nonsynonymous | NM_005475    | c.G1606A  | p.A536T  | 1  |
| SH2B3 | chr12 | 111886081 | rs199803113 | 0.0017 | 0 | nonsynonymous | NM_005475    | c.T1703C  | p.I568T  | 1  |
| NRAS  | chr1  | 115258744 | rs121434596 | .      | 1 | nonsynonymous | NM_002524    | c.G38A    | p.G13D   | 1  |
| MLL   | chr11 | 118307385 | rs9332747   | .      | 0 | nonsynonymous | NM_001197104 | c.C158T   | p.A53V   | 1  |
| MLL   | chr11 | 118307445 | .           | .      | 0 | nonsynonymous | NM_001197104 | c.G218A   | p.G73E   | 1  |
| MLL   | chr11 | 118343848 | rs9332773   | 0.04   | 0 | synonymous    | NM_001197104 | c.C1974T  | p.P658P  | 3  |
| MLL   | chr11 | 118355642 | rs9332801   | 0.04   | 0 | synonymous    | NM_001197104 | c.A4284C  | p.I1428I | 1  |
| MLL   | chr11 | 118365477 | .           | .      | 0 | synonymous    | NM_001197104 | c.A5358C  | p.S1786S | 1  |
| MLL   | chr11 | 118368665 | rs7107305   | 0.03   | 0 | synonymous    | NM_001197104 | c.A5679G  | p.L1893L | 1  |
| MLL   | chr11 | 118373183 | rs201483860 | 0.0017 | 0 | synonymous    | NM_001197104 | c.C6576T  | p.S2192S | 1  |
| MLL   | chr11 | 118373677 | rs9332838   | 0.01   | 0 | nonsynonymous | NM_001197104 | c.C7070G  | p.P2357R | 2  |
| MLL   | chr11 | 118373861 | rs2071702   | 0.03   | 0 | synonymous    | NM_001197104 | c.C7254T  | p.N2418N | 1  |
| MLL   | chr11 | 118375998 | rs150804738 | 0.02   | 0 | nonsynonymous | NM_001197104 | c.G9391A  | p.G3131S | 2  |
| MLL   | chr11 | 118382707 | rs184820566 | 0.0017 | 0 | nonsynonymous | NM_001197104 | c.T11113A | p.S3705T | 1  |
| MLL   | chr11 | 118390741 | rs2276058   | 0.02   | 0 | synonymous    | NM_001197104 | c.T11391C | p.N3797N | 1  |
| CBL   | chr11 | 119168130 | rs143840974 | .      | 0 | synonymous    | NM_005188    | c.G2190C  | p.T730T  | 1  |
| CBL   | chr11 | 119168175 | .           | .      | 0 | synonymous    | NM_005188    | c.C2235T  | p.T745T  | 1  |

|       |      |           |            |        |   |               |              |          |         |    |
|-------|------|-----------|------------|--------|---|---------------|--------------|----------|---------|----|
| GATA2 | chr3 | 128204693 | rs78245253 | 0.05   | 0 | nonsynonymous | NM_001145662 | c.C748G  | p.P250A | 3  |
| GATA2 | chr3 | 128204951 | rs2335052  | 0.37   | 1 | nonsynonymous | NM_001145662 | c.G490A  | p.A164T | 15 |
| GATA2 | chr3 | 128205860 | rs1573858  | 0.66   | 0 | synonymous    | NM_001145662 | c.C15G   | p.P5P   | 25 |
| EZH2  | chr7 | 148511087 | .          | .      | 0 | synonymous    | NM_001203249 | c.C1647T | p.S549S | 1  |
| EZH2  | chr7 | 148525904 | rs2302427  | 0.15   | 0 | nonsynonymous | NM_152998    | c.G436C  | p.D146H | 6  |
| CSF1R | chr5 | 149436927 | .          | .      | 0 | nonsynonymous | NM_005211    | c.C2242T | p.R748W | 1  |
| CSF1R | chr5 | 149450132 | rs10079250 | 0.37   | 0 | nonsynonymous | NM_005211    | c.A1085G | p.H362R | 15 |
| CSF1R | chr5 | 149456893 | rs3829986  | 0.03   | 1 | nonsynonymous | NM_005211    | c.G835A  | p.V279M | 4  |
| CSF1R | chr5 | 149457678 | rs2228422  | 0.19   | 1 | synonymous    | NM_005211    | c.C726T  | p.T242T | 10 |
| CSF1R | chr5 | 149460343 | rs17652007 | 0.24   | 1 | synonymous    | NM_005211    | c.C294T  | p.H98H  | 10 |
| CSF1R | chr5 | 149460459 | rs55865465 | 0.03   | 0 | synonymous    | NM_005211    | c.C178T  | p.L60L  | 1  |
| CSF1R | chr5 | 149460553 | rs216123   | 0.1    | 0 | synonymous    | NM_005211    | c.T84C   | p.P28P  | 6  |
| SPARC | chr5 | 151054227 | rs2304052  | 0.1    | 0 | synonymous    | NM_003118    | c.A66G   | p.E22E  | 3  |
| IDH1  | chr2 | 209108284 | rs62193615 | .      | 0 | nonsynonymous | NM_005896    | c.A565G  | p.I189V | 1  |
| IDH1  | chr2 | 209108317 | rs34218846 | 0.0035 | 1 | nonsynonymous | NM_005896    | c.G532A  | p.V178I | 1  |
| IDH1  | chr2 | 209113192 | rs11554137 | 0.0035 | 1 | synonymous    | NM_005896    | c.C315T  | p.G105G | 1  |

Abbreviations: 1kg: 1000 Genomes Project; c.: nucleotide; CHR: chromosome; p.: amino acid; POS: position;

\*1 represents mutations present in COSMIC database; 0 represents mutations absent in COSMIC database.



**Supplementary Table 6. Total single nucleotide variants and indels after filtration and confirmed by Sanger sequencing**

| Gene              | CHR   | POS       | Exonic Function | c.                       | p.                  | Sample ID | Somatic or Germline | <sup>#</sup> Previously reported            | <sup>*</sup> Cosmic | Annotation         |
|-------------------|-------|-----------|-----------------|--------------------------|---------------------|-----------|---------------------|---------------------------------------------|---------------------|--------------------|
| JAK2              | chr9  | 5073770   | nonsynonymous   | c.G1849T                 | p.V617F             | E1        | Somatic             |                                             | 1                   | Oncogenic          |
| JAK2              | chr9  | 5073770   | nonsynonymous   | c.G1849T                 | p.V617F             | E2        | Somatic             |                                             | 1                   | Oncogenic          |
| JAK2              | chr9  | 5073770   | nonsynonymous   | c.G1849T                 | p.V617F             | E3        | Somatic             |                                             | 1                   | Oncogenic          |
| JAK2              | chr9  | 5073770   | nonsynonymous   | c.G1849T                 | p.V617F             | E5        | Somatic             |                                             | 1                   | Oncogenic          |
| JAK2              | chr9  | 5073770   | nonsynonymous   | c.G1849T                 | p.V617F             | E7        | Somatic             |                                             | 1                   | Oncogenic          |
| JAK2              | chr9  | 5073770   | nonsynonymous   | c.G1849T                 | p.V617F             | E8        | Somatic             |                                             | 1                   | Oncogenic          |
| JAK2              | chr9  | 5064887   | nonsynonymous   | c.T1061C                 | p.I354T             | E8        | Somatic             |                                             | 0                   | Possible oncogenic |
| JAK2              | chr9  | 5044432   | nonsynonymous   | c.G380A                  | p.G127D             | E3        | Somatic             | Acute leukemia susceptibility <sup>20</sup> | 0                   | Possible oncogenic |
| ASXL1             | chr20 | 31023717  | stopgain        | c.C3202T                 | p.R1068X            | E3        | Somatic             | Malignant myeloid diseases <sup>21</sup>    | 1                   | Oncogenic          |
| ASXL1             | chr20 | 31023801  | nonsynonymous   | c.A3286C                 | p.M1096L            | E4        | Somatic             |                                             | 0                   | Unknown            |
| ASXL1             | chr20 | 31022592  | stopgain        | c.C2077T                 | p.R693X             | E1        | Somatic             | Malignant myeloid diseases <sup>21</sup>    | 1                   | Oncogenic          |
| ASXL1             | chr20 | 31024333  | nonsynonymous   | c.G3818A                 | p.R1273H            | E24       | Somatic             | Endometrial carcinoma (Cosmic)              | 1                   | Oncogenic          |
| SH2B3             | chr12 | 111856326 | nonsynonymous   | c.C377A                  | p.P126Q             | E11       | Somatic             |                                             | 0                   | Possible oncogenic |
| U2AF1             | chr21 | 44524456  | nonsynonymous   | c.C101T                  | p.S34F              | E3        | Somatic             | Malignant myeloid diseases <sup>22,23</sup> | 1                   | Oncogenic          |
| FLT3              | chr13 | 28622503  | nonsynonymous   | c.A1114G                 | p.R372G             | E21       | Somatic             |                                             | 0                   | Possible oncogenic |
| NRAS              | chr1  | 115258744 | nonsynonymous   | c.G38A                   | p.G13D              | E1        | Somatic             | Malignant myeloid diseases <sup>24,25</sup> | 1                   | Oncogenic          |
| MLL               | chr11 | 118307445 | nonsynonymous   | c.G218A                  | p.G73E              | E11       | Somatic             |                                             | 0                   | Possible oncogenic |
| GNAS              | chr20 | 57484421  | nonsynonymous   | c.G557A                  | p.R186H             | E18       | Somatic             | Pancreatic carcinoma <sup>26</sup>          | 1                   | Oncogenic          |
| RUNX1             | chr21 | 36259183  | nonsynonymous   | c.C227T                  | p.P76L              | E18       | Somatic             |                                             | 0                   | Possible oncogenic |
| WT1               | chr11 | 32456484  | nonframeshift   | c.408_409ins<br>GCC      | p.P136delin<br>sPP  | E15       | Somatic             |                                             | 0                   | Possible oncogenic |
| ZRSR2             | chrX  | 15841230  | nonframeshift   | c.1314_1315i<br>nsAGCCGG | p.G438deli<br>nsGSR | E13       | Somatic             |                                             | 0                   | Unknown            |
| STAT5B            | chr17 | 40379618  | nonframeshift   | c.213_214ins<br>CTT      | p.K71delins<br>KK   | E19       | Somatic             |                                             | 0                   | Possible oncogenic |
| <sup>‡</sup> CALR | Chr19 | 13054572  | frameshift      | c.1099_1150d<br>el52     | p.L367fs*4<br>6     | E4        | Somatic             |                                             |                     | Oncogenic          |
| SH2B3             | chr12 | 111856368 | nonsynonymous   | c.G419A                  | p.R140H             | E4        | Germline            |                                             | 0                   | NA                 |
| U2AF1             | chr21 | 44513286  | nonsynonymous   | c.G649A                  | p.G217S             | E16       | Germline            |                                             | 0                   | NA                 |
| FLT3              | chr13 | 28623809  | nonsynonymous   | c.G845A                  | p.G282E             | E14       | Germline            |                                             | 0                   | NA                 |
| IDH1              | chr2  | 209108284 | nonsynonymous   | c.A565G                  | p.I189V             | E1        | Germline            |                                             | 0                   | NA                 |
| JAK3              | chr19 | 17953878  | nonsynonymous   | c.G524A                  | p.R175Q             | E10       | Germline            |                                             | 0                   | NA                 |
| GATA1             | chrX  | 48649728  | nonsynonymous   | c.A212C                  | p.H71P              | E12       | Germline            |                                             | 0                   | NA                 |

---

|       |      |           |               |          |         |     |          |   |    |
|-------|------|-----------|---------------|----------|---------|-----|----------|---|----|
| CSF1R | chr5 | 149436927 | nonsynonymous | c.C2242T | p.R748W | E19 | Germline | 0 | NA |
|-------|------|-----------|---------------|----------|---------|-----|----------|---|----|

---

Abbreviations: c: nucleotide; CHR: chromosome; NA: not applicable; p: amino acid; POS: position.

#Only mutations other than JAK2 V617F and CALR mutations are shown.

\*1 represents mutations present in COSMIC database; 0 represents mutations absent in COSMIC database.

‡CALR mutation was detected by Sanger sequencing.

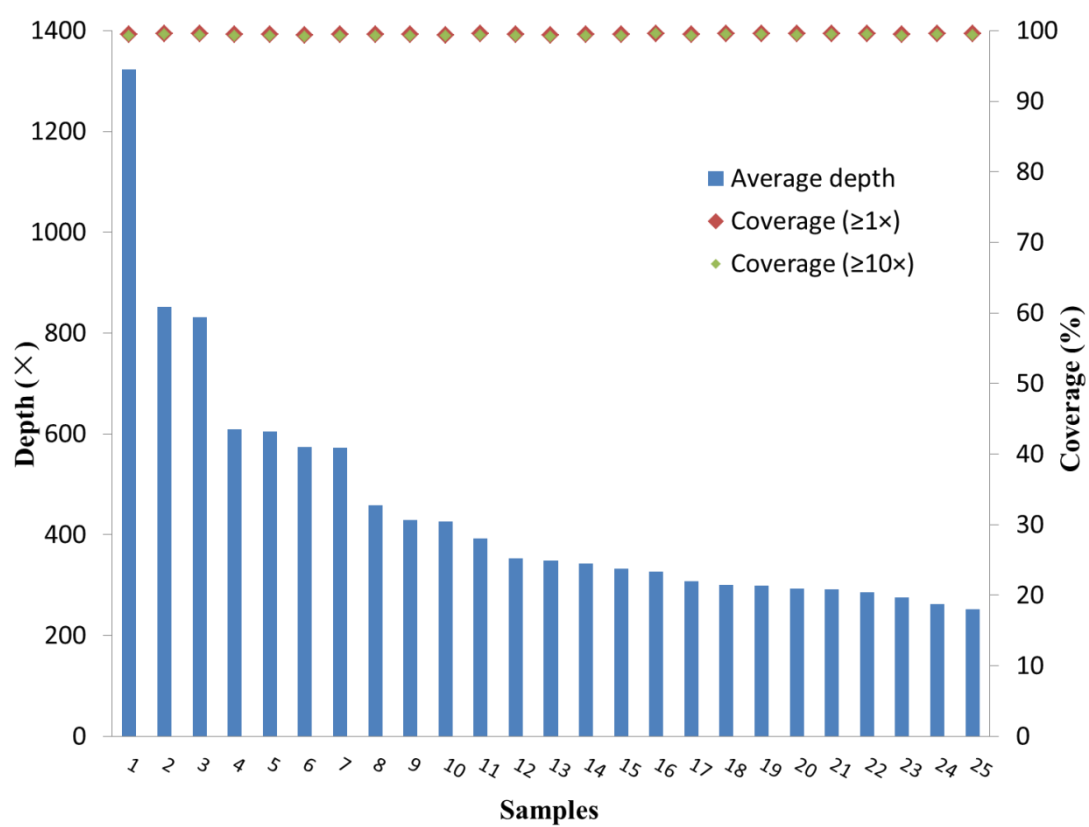

**Supplementary Figure 1. Average depth and coverage of target region**

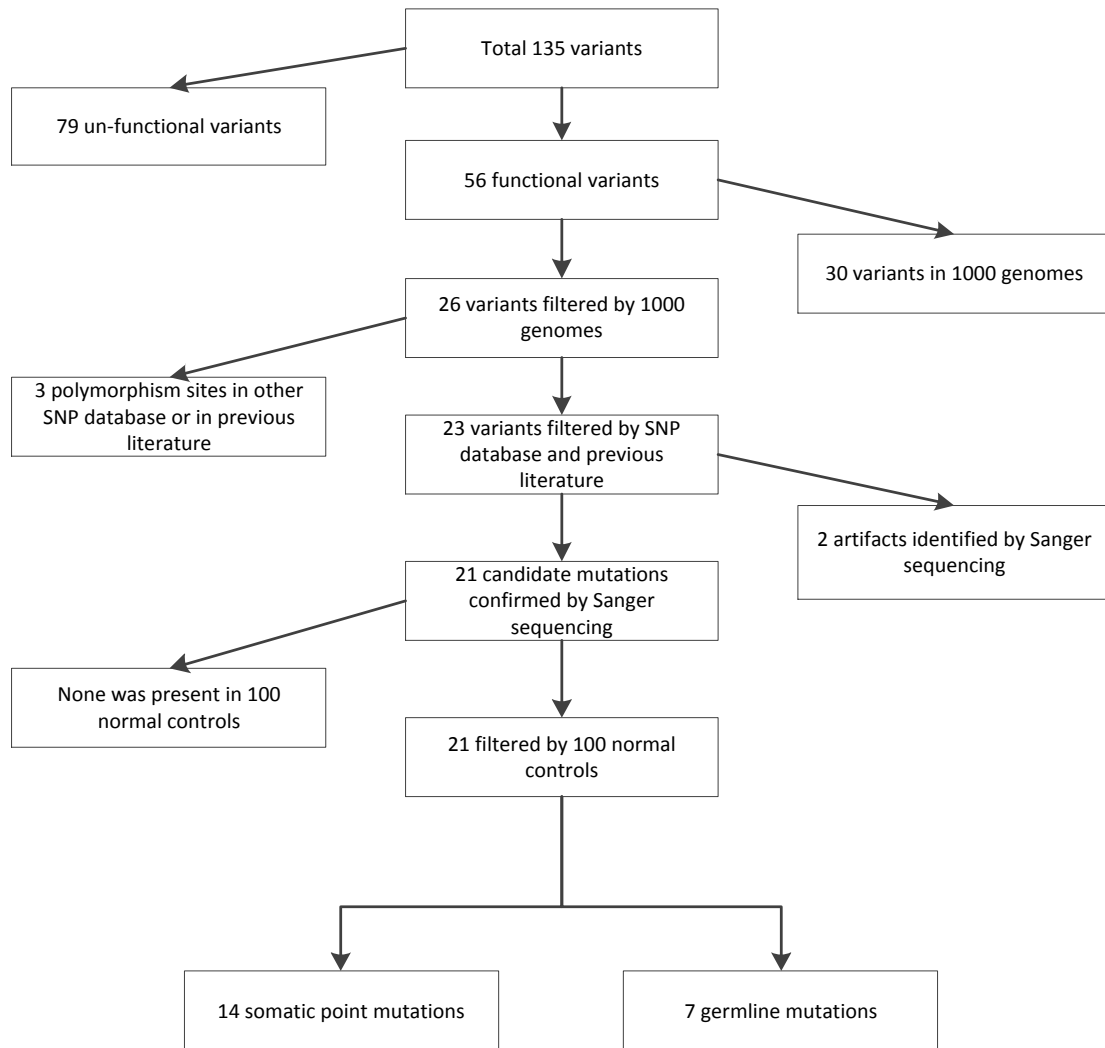

**Supplementary Figure 2. Single nucleotide variant filtration pipeline in targeted high-throughput sequencing analysis**
